# Supplementary material for: Does teaching non-technical skills to medical students improve those skills and simulated patient outcome?
Source: PubMed Central journal article supplement (PMC5376493; doi:10.5116/ijme.58c1.9f0d), 2017-03-29
Supplement: ijme-8-101-S1.pdf [file ijme-8-101-S1.pdf]

**Appendix A**

Overview of the non-technical skills observation system (behavioural markers are examples and therefore incomplete)

| Category                   | Elements                                   | Behavioural markers - General example items                   | Behavioural markers – Specific example items                                    |
|----------------------------|--------------------------------------------|---------------------------------------------------------------|---------------------------------------------------------------------------------|
| <b>Situation awareness</b> | Gathering information                      | Procures information for anamnesis                            | Inquiry about previous illnesses, reason for hospital admission                 |
|                            | Recognising and understanding              | Provides others with information about the patient's symptoms | "Patient has ...!"                                                              |
|                            | Anticipating                               | Gives orders for possibly occurring problems                  | "If intubation impossible, mask ventilation."                                   |
| <b>Task management</b>     | Planning and preparing                     | Communicates plans to colleagues                              | "We will now ...!" / "I will now...!"                                           |
|                            | Prioritising                               | Discusses the important points with others                    | "First administration of oxygen, then stabilisation of the circulatory system." |
|                            | Providing and maintaining standards        | Fulfils standards                                             | Recognisable prioritisation/ positioning of devices                             |
|                            | Identifying and utilising resources        | Recognises available resources and uses them                  | Delegation of actions (oxygen mask/ blood pressure measurement)                 |
|                            | Useful distribution of tasks               | Can instruct employees                                        | Corrects technique cardiac pressure massage, admission of oxygen, supervision   |
| <b>Team working</b>        | Co-ordinating activities with team members | Coordinates with others                                       | No cardiac pressure massage with a simultaneous intubation                      |
|                            | Exchanging information                     | Speaks loudly and clearly                                     | Expresses the instructions clearly and comprehensibly                           |
|                            | Using authority and assertiveness          | Assumes responsibility and leadership                         | Keeps leading the team, remains as supervisor                                   |
|                            | Assessing competencies                     | Checks the others' skills and knowledge earlier               | "Can you do this measure? Have you done it before?"                             |
|                            | Supporting others                          | Informs the team after a difficult case and thanks them       | Informs about the outcome of the intervention, "thank you for your support."    |
| <b>Decision making</b>     | Identifying options                        | Generates different options                                   | "We could either do measure ..., or measure..."                                 |
|                            | Balancing risks and selecting options      | Performs a selected option completely                         | Complete performance of the announced option                                    |
|                            | Re-evaluating                              | Continues rethinking treatment options                        | "Another alternative would be ..."                                              |
