# Supplementary material for: Does teaching non-technical skills to medical students improve those skills and simulated patient outcome?
Source: PubMed Central journal article supplement (PMC5376493; doi:10.5116/ijme.58c1.9f0d), 2017-03-29
Supplement: ijme-8-101-S2.pdf [file ijme-8-101-S2.pdf]

**Appendix B**

## Overview of all collected medical data in Simulation I and Simulation II

| <b>Simulation No.</b> | <b>Observed criteria</b>                                                                                                                                                                                                                                                                                                                                                                                                                                                                                                                                                                                                                                                                                                                                                                                                                                                                                                                                                                                                                                                                                                                                                                                                                                                                                                                                                                                                                                                                    |
|-----------------------|---------------------------------------------------------------------------------------------------------------------------------------------------------------------------------------------------------------------------------------------------------------------------------------------------------------------------------------------------------------------------------------------------------------------------------------------------------------------------------------------------------------------------------------------------------------------------------------------------------------------------------------------------------------------------------------------------------------------------------------------------------------------------------------------------------------------------------------------------------------------------------------------------------------------------------------------------------------------------------------------------------------------------------------------------------------------------------------------------------------------------------------------------------------------------------------------------------------------------------------------------------------------------------------------------------------------------------------------------------------------------------------------------------------------------------------------------------------------------------------------|
| <b>Simulation I</b>   | Understanding the gravity of the situation (yes/no)<br>Taking the patient's history quickly (yes/no)<br>Checking airway, breathing and circulation (yes/no)<br>Flattening the bed or using a reanimation board (yes/no)<br>Continuing resuscitation measures (yes/no)<br>Call for help (yes/no)<br>Time until emergency call (seconds)<br>Application of ERC guidelines (yes/no)<br>Time until first rhythm analysis (seconds)<br>No-flow-time from beginning of the scenario until continuing resuscitation measures (seconds)<br>Providing pure oxygen ventilation (yes/no)<br>Recognition of ventricular fibrillation (yes/no)<br>Continuing chest compressions until administration of an electric shock (yes/no)<br>Time until the first defibrillation (seconds)<br>Administration of amiodarone after third unsuccessful defibrillation (yes/no)<br>Time until first administration of amiodarone (seconds)<br>Administration of epinephrine after third unsuccessful defibrillation (yes/no)<br>Time until first administration of epinephrine (seconds)<br>Repetition of epinephrine administration after 3 – 5 minutes (yes/no)<br>Return of spontaneous circulation (yes/no)<br>Time until return of spontaneous circulation (seconds)<br>Using pulse oximetry (yes/no)<br>Using (non-invasive) measurement of blood pressure (yes/no)                                                                                                                                           |
| <b>Simulation II</b>  | Progression of scenario to second phase "worsening anaphylaxis" (yes/no)<br>Progression of scenario to last phase "severe anaphylaxis" (yes/no)<br>Improving patient's condition (yes/no)<br>Time until improving patient's condition (seconds)<br>Taking the patient's history quickly (yes/no)<br>Diagnosing an "anaphylactic reaction" (yes/no)<br>Time until diagnosing "anaphylactic reaction" (seconds)<br>Making a wrong suspected diagnosis (yes/no)<br>Call for help (yes/no)<br>Time until emergency call (seconds)<br>Stopping antibiotic infusion (yes/no)<br>Time until stopping antibiotic infusion (seconds)<br>Provided oxygen therapy via non-rebreathing mask (yes/no)<br>Time until oxygen administration (seconds)<br>Elevating position of the upper body (yes/no)<br>Antihistamine administration (yes/no)<br>Time until antihistamine administration (seconds)<br>Initiation of blood volume expansion therapy (yes/no)<br>Time until initiation of blood volume expansion therapy (seconds)<br>Administration of epinephrine (yes/no)<br>Time until first administration of epinephrine (seconds)<br>Using pulse oximetry (yes/no)<br>Time until connecting pulse oximetry (seconds)<br>Using (non-invasive) measurement of blood pressure (yes/no)<br>Time until first (non-invasive) measurement of blood pressure (seconds)<br>Repetition of (non-invasive) measurement of blood pressure (yes/no)<br>Securing respiratory track with endotracheal tube (yes/no) |
