# Supplementary material for: Does teaching non-technical skills to medical students improve those skills and simulated patient outcome?
Source: PubMed Central journal article supplement (PMC5376493; doi:10.5116/ijme.58c1.9f0d), 2017-03-29
Supplement: ijme-8-101-S3.pdf [file ijme-8-101-S3.pdf]

**Appendix C**

Demographic data and study variables at baseline measurement (before seminar intervention)

| Variables                      | NTS Group<br>Mean (SD) | Control Group<br>Mean (SD) | Significance                             |
|--------------------------------|------------------------|----------------------------|------------------------------------------|
| Age                            | 25.98 (3.70)           | 25.88 (3.26)               | $t_{(75)} = 0.12, p = .91, r = 0.01$     |
| Students' semester             | 7.84 (1.05)            | 8.21 (.48)                 | $t_{(75)} = -1.90, p = .06, r = 0.21$    |
| <b>Presence</b>                |                        |                            |                                          |
| Presence                       | 3.55 (1.02)            | 3.23 (1.00)                | $t_{(75)} = 1.38, p = .17, r = 0.16$     |
| <b>Stress</b>                  |                        |                            |                                          |
| Stress                         | 2.75 (0.55)            | 2.90 (0.39)                | $t_{(74.25)} = -1.41, p = .16, r = 0.16$ |
| <b>Attitude</b>                |                        |                            |                                          |
| Leadership                     | 3.23 (0.50)            | 3.32 (0.34)                | $t_{(75)} = -0.95, p = .35, r = 0.11$    |
| Assertiveness                  | 2.81 (0.71)            | 2.75 (0.68)                | $t_{(75)} = 0.38, p = .70, r = 0.04$     |
| Debriefing                     | 3.71 (0.40)            | 3.56 (0.53)                | $t_{(75)} = 1.42, p = .16, r = 0.16$     |
| Feedback                       | 3.63 (0.54)            | 3.59 (0.56)                | $t_{(75)} = 0.32, p = .75, r = 0.04$     |
| Realistic perception of stress | 2.76 (0.86)            | 2.74 (0.59)                | $t_{(75)} = 0.14, p = .89, r = 0.02$     |
| Denial of stress               | 1.92 (0.99)            | 1.81 (.78)                 | $t_{(75)} = 0.53, p = .60, r = 0.06$     |
| Dealing with mistakes          | 2.49 (0.87)            | 2.76 (0.63)                | $t_{(75)} = -1.56, p = .12, r = 0.18$    |
| Teamwork                       | 2.70 (0.63)            | 2.71 (0.64)                | $t_{(75)} = 0.06, p = .96, r = 0.01$     |
| <b>NTS</b>                     |                        |                            |                                          |
| Situation awareness            | 1.17 (0.50)            | 1.18 (0.43)                | $t_{(75)} = -1.14, p = .89, r = 0.13$    |
| Task management                | 1.40 (0.65)            | 1.30 (0.56)                | $t_{(75)} = 0.69, p = .49, r = 0.08$     |
| Teamwork                       | 1.37 (0.57)            | 1.31 (0.53)                | $t_{(75)} = 0.44, p = .66, r = 0.05$     |
| Decision making                | 0.90 (0.58)            | 0.85 (0.58)                | $t_{(75)} = 0.39, p = .70, r = 0.04$     |

Range of scales: Presence from 0 to 5, Stress from 0 to 4, Attitudes from 0 to 4, and NTS from 0 to 3.
